# Supplementary material for: Two-stage evolution from phosphate to sulfate of new KTP-type family members as UV nonlinear optical materials through chemical cosubstitution-oriented design
Source: Royal Society of Chemistry journal article supplement (doi:10.1039/d0dt00846j), 2020-01-01
Supplement: d0dt00846j1.pdf [file d0dt00846j1.pdf]

## Electronic Supplementary Information

# Two-Stage Evolution from Phosphate to Sulfate of New KTP-type family Members as UV Nonlinear Optical Materials through Chemical Cosubstitution-Oriented Design

Fangfang He,<sup>a</sup> Yuwei Ge,<sup>a</sup> Xiaoyu Zhao,<sup>b</sup> Jing He,<sup>a</sup> Ling Huang,<sup>\*a</sup> Daojiang Gao,<sup>a</sup> Jian Bi,<sup>a</sup> Xin Wang<sup>b</sup> and Guohong Zou<sup>\*b</sup>

<sup>a</sup> College of Chemistry and Materials Science, Sichuan Normal University, Chengdu, 610068, P. R. China.

<sup>b</sup> College of Chemistry, Sichuan University, Chengdu, 610064, P. R. China.

E-mail: huangl026@sina.com; zough@scu.edu.cn

### Table of contents

| Sections    | Titles                                                                                                                                                                    | Pages |
|-------------|---------------------------------------------------------------------------------------------------------------------------------------------------------------------------|-------|
| Sections S1 | Materials and Methods (Synthesis, Instrumentations, and Computational Details)                                                                                            | S2    |
| Fig S1      | The crystal photographs of (a) $\text{NH}_4\text{SbFPO}_4 \cdot \text{H}_2\text{O}$ and (b) $\text{NH}_4\text{SbF}_2\text{SO}_4$ .                                        | S2    |
| Table S1    | Crystal Data and Structure Refinements for $\text{NH}_4\text{SbFPO}_4 \cdot \text{H}_2\text{O}$ and $\text{NH}_4\text{SbF}_2\text{SO}_4$ .                                | S4    |
| Table S2    | Fractional atomic coordinates and isotropic or equivalent isotropic displacement parameters ( $\text{\AA}^2$ ) for $\text{NH}_4\text{SbFPO}_4 \cdot \text{H}_2\text{O}$ . | S5    |
| Table S3    | Fractional atomic coordinates and isotropic or equivalent isotropic displacement parameters ( $\text{\AA}^2$ ) for $\text{NH}_4\text{SbF}_2\text{SO}_4$ .                 | S5    |
| Table S4    | Selected Bond lengths ( $\text{\AA}$ ) and angles (deg) for $\text{NH}_4\text{SbFPO}_4 \cdot \text{H}_2\text{O}$ .                                                        | S6    |
| Table S5    | Selected Bond lengths ( $\text{\AA}$ ) and angles (deg) for $\text{NH}_4\text{SbF}_2\text{SO}_4$ .                                                                        | S7    |
| Table S6    | Calculation of dipole moment for $\text{SO}_4$ , $\text{SbO}_2\text{F}_2$ polyhedra and net dipole moment for a unit cell in $\text{NH}_4\text{SbF}_2\text{SO}_4$ .       | S8    |
| Fig S2      | The IR spectra of (a) $\text{NH}_4\text{SbFPO}_4 \cdot \text{H}_2\text{O}$ and (b) $\text{NH}_4\text{SbF}_2\text{SO}_4$ .                                                 | S9    |
| Fig S3      | TGA curves of (a) $\text{NH}_4\text{SbFPO}_4 \cdot \text{H}_2\text{O}$ and (b) $\text{NH}_4\text{SbF}_2\text{SO}_4$ under $\text{N}_2$ atmosphere.                        | S9    |
| Fig S4      | Calculated band structures of $\text{KTiOPO}_4$ (a), $\text{NH}_4\text{SbFPO}_4 \cdot \text{H}_2\text{O}$ (b) and $\text{NH}_4\text{SbF}_2\text{SO}_4$ (c).               | S9    |
| References  |                                                                                                                                                                           | S10   |

## Section S1. Materials and Methods

**Synthesis.** All of the starting reagents were analytical grade and used without further purification process,  $(\text{NH}_4)_3\text{PO}_4 \cdot 3\text{H}_2\text{O}$  (AR 99%),  $(\text{NH}_4)_2\text{SO}_4$  (AR 99%),  $\text{SbF}_3$  (AR 99%). The single crystals of  $\text{NH}_4\text{SbFPO}_4 \cdot \text{H}_2\text{O}$  and  $\text{NH}_4\text{SbF}_2\text{SO}_4$  were synthesized by hydrothermal method. The constituent are as follows:  $(\text{NH}_4)_3\text{PO}_4 \cdot 3\text{H}_2\text{O}$  (0.203 g, 1 mmol),  $\text{SbF}_3$  (0.358 g, 2 mmol) and 0.6 mL  $\text{H}_2\text{O}$  for  $\text{NH}_4\text{SbFPO}_4 \cdot \text{H}_2\text{O}$ , and  $(\text{NH}_4)_2\text{SO}_4$  (0.132 g, 1 mmol),  $\text{SbF}_3$  (0.356 g, 2 mmol) and 1 mL  $\text{H}_2\text{SO}_4$  (4 mol/L) for  $\text{NH}_4\text{SbF}_2\text{SO}_4$ , respectively. The reactants were sealed in a 23 mL Teflon autoclave and then were put into the oven. The oven temperature held at 180 °C for 4 days, and then cooled down to the ambient temperature with the rate of 5°C/h. Transparent colorless crystals were achieved with 60-70% yield (based on Sb).

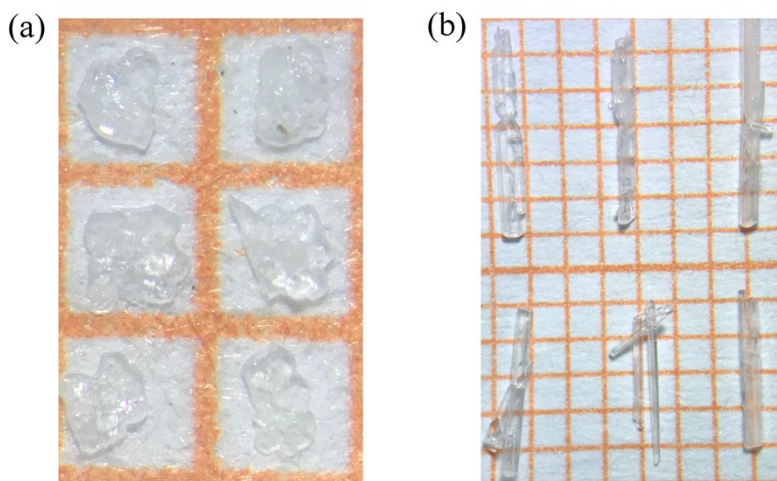

**Fig. S1.** The crystal photographs of (a)  $\text{NH}_4\text{SbFPO}_4 \cdot \text{H}_2\text{O}$  and (b)  $\text{NH}_4\text{SbF}_2\text{SO}_4$ .

**Instrumentations.** Data collections for single crystals of the compounds were performed on a Bruker D8 Venture diffractometer and equipped with a graphite monochromatic  $\text{Mo-K}\alpha$  radiation ( $\lambda = 0.71073 \text{ \AA}$ ) at 150(2) K. The crystal structures were solved by direct methods and refined by a full-matrix least-squares on  $F^2$  with SHELX-2014<sup>1</sup> and Olex2. The structures were checked by PLATON,<sup>2</sup> and no higher symmetries were found. Crystallographic data and structural refinements information are summarized in Table 1. Atomic coordinates and isotropic displacement parameters, and selected bond lengths are listed in Table S1-S4. Powder X-ray diffraction patterns of the compounds were measured at room temperature by a Smart lab powder X-ray diffractometer using  $\text{Cu K}\alpha$  radiation ( $\lambda=1.540598 \text{ \AA}$ ) in the  $2\theta$  range of 5-70° with a step width of 0.08° and a fixed counting time of 0.2 s/step. The IR data were recorded with a Vertex 70 Fourier transform infrared (FT-IR) spectrometer in the range of 4000-400  $\text{cm}^{-1}$ .

Thermogravimetric analysis (TGA) were measured on a DISCOVERYTGA thermal analyzer and sample powders were heated under N<sub>2</sub> gas atmosphere from room temperature to 800 °C at a rate of 10 °C /min. UV/vis diffuse reflectance data for compounds were recorded with a Shimadzu UV-2600 spectrophotometer at room temperature in the wavelength range 200-800 nm with the resolution of 1 nm for the UV/vis range. The power frequency-doubling signal of NH<sub>4</sub>SbF<sub>2</sub>SO<sub>4</sub> was measured by the Kurtz and Perry method at room temperature with 1064nm Q-switch Nd:YAG laser on powdered samples.<sup>3</sup> All of the samples were ground and divided into the following six distinct particle size: 25-45, 45-58, 58-75, 75-106, 106-150 and 150-212 μm, respectively. Sieved powders of KDP (KH<sub>2</sub>PO<sub>4</sub>) were used as reference. To better understand the electronic structures of NH<sub>4</sub>SbFPO<sub>4</sub>·H<sub>2</sub>O and NH<sub>4</sub>SbF<sub>2</sub>SO<sub>4</sub>, their structures were optimized and band structures and density of states (DOS)/ partial DOS (PDOS) were then calculated by employing the density functional theory (DFT) in the CASTEP suite of program.<sup>4</sup> In all calculations, the Perdew-Burke-Ernzerhof (PBE) functional with generalized gradient approximation (GGA) was adopted.<sup>5</sup> The kinetic energy cutoff of 850 eV and 300.0 eV were chosen for NH<sub>4</sub>SbFPO<sub>4</sub>·H<sub>2</sub>O and NH<sub>4</sub>SbF<sub>2</sub>SO<sub>4</sub>, respectively, and the *k*-point sampling in the Brillouin zone were used to be 5×5×5 for NH<sub>4</sub>SbFPO<sub>4</sub>·H<sub>2</sub>O and 3×3×6 for NH<sub>4</sub>SbF<sub>2</sub>SO<sub>4</sub>. Ultrasoft pseudopotentials (USP) were employed for all the valence electrons.<sup>6</sup>

**Table S1.** Crystal Data and Structure Refinements for  $\text{NH}_4\text{SbFPO}_4 \cdot \text{H}_2\text{O}$  and  $\text{NH}_4\text{SbF}_2\text{SO}_4$ .

| Formula                                       | $\text{NH}_4\text{SbFPO}_4 \cdot \text{H}_2\text{O}$ | $\text{NH}_4\text{SbF}_2\text{SO}_4$ |
|-----------------------------------------------|------------------------------------------------------|--------------------------------------|
| <b>Formula weight</b>                         | 271.78                                               | 273.85                               |
| <b>Crystal system</b>                         | Triclinic                                            | Orthorhombic                         |
| <b>Space group</b>                            | $P\bar{1}$                                           | $Pna2_1$                             |
| $a$ (Å)                                       | 6.5374(4)                                            | 9.5730 (7)                           |
| $b$ (Å)                                       | 6.5425(5)                                            | 11.5948 (7)                          |
| $c$ (Å)                                       | 8.3743(6)                                            | 5.1311 (4)                           |
| $V$ (Å <sup>3</sup> )                         | 306.95(4)                                            | 569.54 (7)                           |
| $\alpha$ (°)                                  | 68.272 (3)                                           | 90                                   |
| $\beta$ (°)                                   | 68.966 (3)                                           | 90                                   |
| $\gamma$ (°)                                  | 89.938 (4)                                           | 90                                   |
| $Z$                                           | 2                                                    | 2                                    |
| $D_{\text{calcd}}$ (g·cm <sup>-3</sup> )      | 2.941                                                | 3.194                                |
| <b>Temperature (K)</b>                        | 150 (2)                                              | 150 (2)                              |
| $\lambda$ (Å)                                 | 0.71073                                              | 0.71073                              |
| $F(000)$                                      | 256                                                  | 512                                  |
| $\mu$ (mm <sup>-1</sup> )                     | 4.735                                                | 5.202                                |
| <b>GOF on <math>F^2</math></b>                | 0.973                                                | 1.005                                |
| $R_1, wR_2$ ( $I > 2\sigma(I)$ ) <sup>a</sup> | 0.0344/0.0910                                        | 0.0223/0.0537                        |
| $R_1, wR_2$ (all data)                        | 0.0396/0.0948                                        | 0.0261/0.0554                        |

$$R_1(F) = \frac{\sum ||F_o| - |F_c||}{\sum |F_o|} \cdot wR_2(F_o^2) = \left[ \frac{\sum w(F_o^2 - F_c^2)^2}{\sum w(F_o^2)^2} \right]^{1/2}$$

**Table S2.** Fractional atomic coordinates and isotropic or equivalent isotropic displacement parameters ( $\text{\AA}^2$ ) for  $\text{NH}_4\text{SbFPO}_4 \cdot \text{H}_2\text{O}$ .

| atom | <i>x</i>    | <i>y</i>     | <i>z</i>    | $U_{\text{eq}}$ ( $\text{\AA}^2$ ) | BVS   |
|------|-------------|--------------|-------------|------------------------------------|-------|
| Sb1  | 0.27454 (5) | 0.77565 (5)  | 0.44372 (4) | 0.01015 (14)                       | 3.194 |
| P1   | 0.2497 (2)  | 0.25022 (19) | 0.4996 (2)  | 0.0100 (2)                         | 4.739 |
| F1   | 0.3973 (5)  | 0.9030 (5)   | 0.1748 (4)  | 0.0144 (6)                         | 0.922 |
| O1   | 0.3710 (6)  | 0.2490 (6)   | 0.6277 (5)  | 0.0133 (7)                         | 1.720 |
| O2   | 0.3679 (6)  | 0.1300 (6)   | 0.3727 (5)  | 0.0126 (7)                         | 1.736 |
| O3   | 0.2485 (6)  | 0.4912 (5)   | 0.3742 (5)  | 0.0121 (7)                         | 1.781 |
| O4   | 0.0104 (6)  | 0.1310 (6)   | 0.6258 (5)  | 0.0140 (7)                         | 1.774 |
| O5   | 0.1482 (8)  | 0.2278 (8)   | 0.9962 (7)  | 0.0293 (10)                        | 2.028 |
| N1   | 0.7194 (8)  | 0.3482 (9)   | 0.0132 (7)  | 0.0179 (9)                         |       |

**Table S3.** Fractional atomic coordinates and isotropic or equivalent isotropic displacement parameters ( $\text{\AA}^2$ ) for  $\text{NH}_4\text{SbF}_2\text{SO}_4$ .

| atom | <i>x</i>     | <i>y</i>     | <i>z</i>     | $U_{\text{eq}}$ ( $\text{\AA}^2$ ) | BVS   |
|------|--------------|--------------|--------------|------------------------------------|-------|
| Sb1  | 0.16783 (4)  | 0.58335 (3)  | 0.17349 (17) | 0.02151 (15)                       | 2.928 |
| S1   | 0.21412 (18) | 0.36668 (15) | 0.7173 (4)   | 0.0238 (4)                         | 5.951 |
| F1   | 0.3690 (4)   | 0.5735 (3)   | 0.1498 (18)  | 0.0272 (11)                        | 0.915 |
| F2   | 0.1719 (4)   | 0.6512 (4)   | -0.1692 (9)  | 0.0264 (11)                        | 0.930 |
| N1   | 0.5089 (6)   | 0.3456 (5)   | 1.194 (2)    | 0.0259 (13)                        |       |
| O1   | 0.3067 (6)   | 0.4448 (5)   | 0.5810 (13)  | 0.0276 (12)                        | 1.684 |
| O2   | 0.0952 (5)   | 0.3316 (4)   | 0.5590 (12)  | 0.0283 (12)                        | 1.692 |
| O3   | 0.2965 (6)   | 0.2631 (5)   | 0.8061 (13)  | 0.0310 (13)                        | 1.886 |
| O4   | 0.1608 (6)   | 0.4194 (5)   | 0.9655 (14)  | 0.0291 (14)                        | 1.961 |

**Table S4.** Selected Bond lengths (Å) and angles (deg) for NH<sub>4</sub>SbFPO<sub>4</sub>·H<sub>2</sub>O.

|                                         |             |                          |           |
|-----------------------------------------|-------------|--------------------------|-----------|
| Sb1—F1                                  | 1.930 (3)   | P1—O2                    | 1.540 (4) |
| Sb1—O4 <sup>i</sup>                     | 2.167 (4)   | P1—O4                    | 1.542 (4) |
| Sb1—O3                                  | 2.169 (3)   | P1—O1                    | 1.544 (4) |
| Sb1—O2 <sup>ii</sup>                    | 2.196 (3)   | O1—Sb1 <sup>iii</sup>    | 2.198 (3) |
| Sb1—O1 <sup>iii</sup>                   | 2.198 (4)   | O2—Sb1 <sup>iv</sup>     | 2.196 (3) |
| P1—O3                                   | 1.539 (3)   | O4—Sb1 <sup>i</sup>      | 2.167 (3) |
| F1—Sb1—O4 <sup>i</sup>                  | 76.53 (14)  | O3—P1—O2                 | 108.0 (2) |
| F1—Sb1—O3                               | 76.68 (13)  | O3—P1—O4                 | 110.3 (2) |
| O4 <sup>i</sup> —Sb1—O3                 | 87.35 (13)  | O2—P1—O4                 | 110.4 (2) |
| F1—Sb1—O2 <sup>ii</sup>                 | 76.61 (13)  | O3—P1—O1                 | 110.1 (2) |
| O4 <sup>i</sup> —Sb1—O2 <sup>ii</sup>   | 86.90 (13)  | O2—P1—O1                 | 110.6 (2) |
| O3—Sb1—O2 <sup>ii</sup>                 | 153.29 (14) | O4—P1—O1                 | 107.5 (2) |
| F1—Sb1—O1 <sup>iii</sup>                | 76.66 (13)  | P1—O1—Sb1 <sup>iii</sup> | 123.2 (2) |
| O4 <sup>i</sup> —Sb1—O1 <sup>iii</sup>  | 153.19 (15) | P1—O2—Sb1 <sup>iv</sup>  | 123.3 (2) |
| O3—Sb1—O1 <sup>iii</sup>                | 87.02 (13)  | P1—O3—Sb1                | 124.1 (2) |
| O2 <sup>ii</sup> —Sb1—O1 <sup>iii</sup> | 86.46 (13)  | P1—O4—Sb1 <sup>i</sup>   | 123.6 (2) |

Symmetry codes: (i)  $-x, -y+1, -z+1$ ; (ii)  $x, y+1, z$ ; (iii)  $-x+1, -y+1, -z+1$ ; (iv)  $x, y-1, z$ .

**Table S5.** Selected Bond lengths (Å) and angles (deg) for NH<sub>4</sub>SbF<sub>2</sub>SO<sub>4</sub>.

|                                       |           |                          |           |
|---------------------------------------|-----------|--------------------------|-----------|
| Sb1—F2                                | 1.927 (5) | S1—O3                    | 1.507 (6) |
| Sb1—F1                                | 1.933 (4) | N1—H1                    | 0.96 (6)  |
| Sb1—O4 <sup>i</sup>                   | 2.181 (6) | N1—H2                    | 0.83 (12) |
| Sb1—O3 <sup>ii</sup>                  | 2.219 (6) | N1—H3                    | 0.92 (11) |
| S1—O1                                 | 1.447 (6) | N1—H4                    | 0.82 (12) |
| S1—O2                                 | 1.456 (6) | O3—Sb1 <sup>iii</sup>    | 2.219 (6) |
| S1—O4                                 | 1.502 (7) | O4—Sb1 <sup>iv</sup>     | 2.181 (6) |
| F2—Sb1—F1                             | 87.0 (3)  | O2—S1—O3                 | 110.8 (3) |
| F2—Sb1—O4 <sup>i</sup>                | 84.8 (2)  | O4—S1—O3                 | 104.2 (4) |
| F1—Sb1—O4 <sup>i</sup>                | 87.0 (2)  | H1—N1—H2                 | 109 (10)  |
| F2—Sb1—O3 <sup>ii</sup>               | 83.9 (2)  | H1—N1—H3                 | 115 (8)   |
| F1—Sb1—O3 <sup>ii</sup>               | 85.5 (2)  | H2—N1—H3                 | 94 (10)   |
| O4 <sup>i</sup> —Sb1—O3 <sup>ii</sup> | 166.8 (2) | H1—N1—H4                 | 112 (7)   |
| O1—S1—O2                              | 112.6 (4) | H2—N1—H4                 | 116 (8)   |
| O1—S1—O4                              | 111.3 (3) | H3—N1—H4                 | 109 (10)  |
| O2—S1—O4                              | 108.7 (3) | S1—O3—Sb1 <sup>iii</sup> | 137.4 (4) |
| O1—S1—O3                              | 108.9 (3) | S1—O4—Sb1 <sup>iv</sup>  | 139.4 (4) |

Symmetry codes: (i)  $x, y, z-1$ ; (ii)  $-x+1/2, y+1/2, z-1/2$ ; (iii)  $-x+1/2, y-1/2, z+1/2$ ; (iv)  $x, y, z+1$ .

**Table S6.** Calculation of dipole moment for SO<sub>4</sub>, SbO<sub>2</sub>F<sub>2</sub> polyhedra and net dipole moment for a unit cell in NH<sub>4</sub>SbF<sub>2</sub>SO<sub>4</sub> (D = Debyes).

| NH <sub>4</sub> SbF <sub>2</sub> SO <sub>4</sub> |                           |                      |                      |                      |
|--------------------------------------------------|---------------------------|----------------------|----------------------|----------------------|
| Polar unit<br>(a unit cell)                      | Dipole moment (D)         |                      |                      |                      |
|                                                  | <i>x</i> -component       | <i>y</i> -component  | <i>z</i> -component  | total magnitude      |
| SO <sub>4</sub>                                  | 0.275653                  | -0.77781             | -2.05917             | 2.218371             |
|                                                  | -0.27565                  | -0.77781             | -2.05917             | 2.218371             |
|                                                  | 0.275653                  | 0.77781              | -2.05917             | 2.218371             |
|                                                  | -0.27565                  | 0.77781              | -2.05917             | 2.218371             |
|                                                  | <i>U<sub>x</sub></i>      | <i>U<sub>y</sub></i> | <i>U<sub>z</sub></i> | <i>U<sub>t</sub></i> |
|                                                  | 1.69E-14                  | 3.38E-14             | -8.2367              | 8.236695             |
| SbO <sub>2</sub> F <sub>2</sub>                  | -12.5688                  | 4.27437              | 12.89603             | 18.50816             |
|                                                  | 12.56837                  | 4.27381              | 12.89628             | 18.50793             |
|                                                  | -12.5712                  | -4.2766              | 12.89641             | 18.5106              |
|                                                  | 12.57122                  | -4.2766              | 12.89641             | 18.5106              |
|                                                  | <i>U<sub>x</sub></i>      | <i>U<sub>y</sub></i> | <i>U<sub>z</sub></i> | <i>U<sub>t</sub></i> |
|                                                  | -0.0004                   | -0.00502             | 51.58511             | 51.58511             |
| Net dipole moment                                | -4.00E-04                 | -5.02E-03            | 43.34841             | 43.34841             |
| Cell Volume                                      | 569.54 (7) Å <sup>3</sup> |                      |                      |                      |



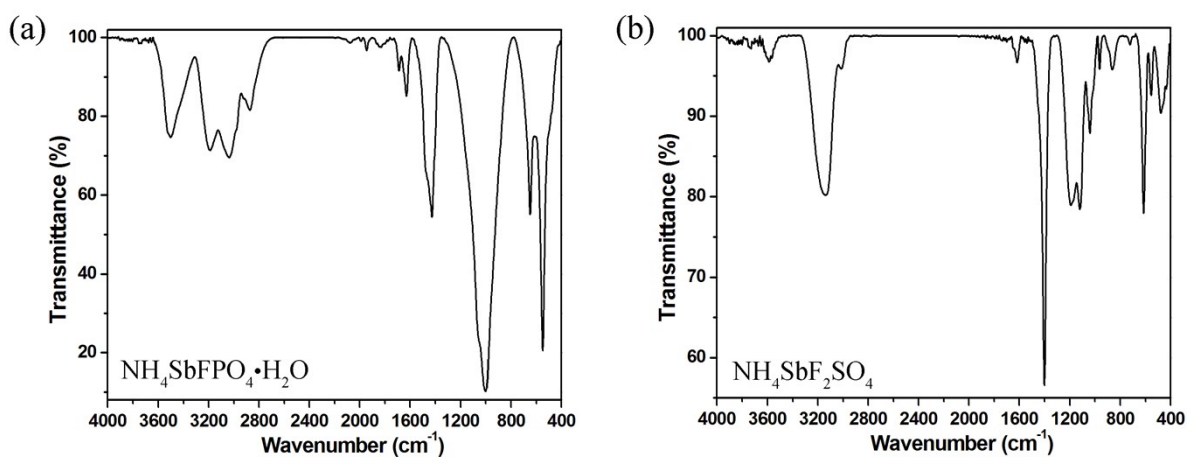

**Fig. S2.** The IR spectra of (a)  $\text{NH}_4\text{SbFPO}_4 \cdot \text{H}_2\text{O}$  and (b)  $\text{NH}_4\text{SbF}_2\text{SO}_4$ .

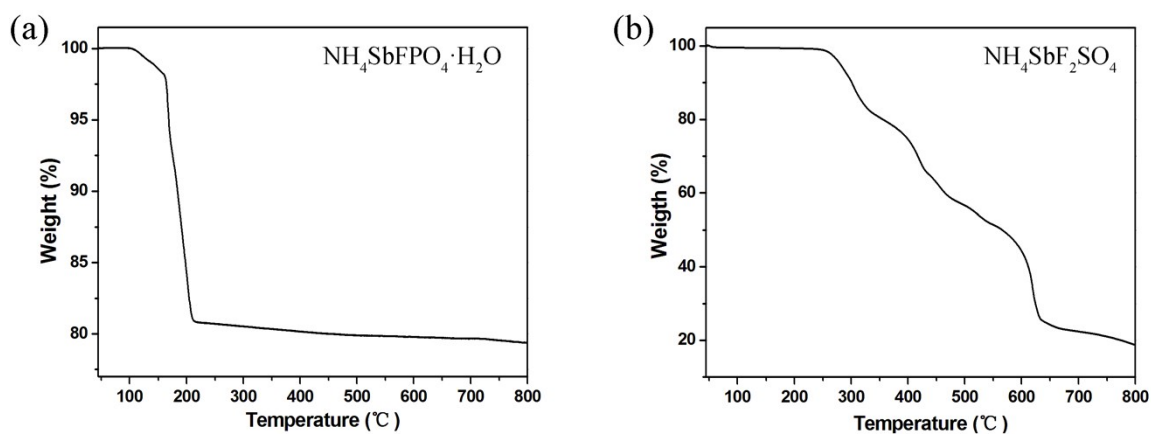

**Fig. S3.** TGA curves of (a)  $\text{NH}_4\text{SbFPO}_4 \cdot \text{H}_2\text{O}$  and (b)  $\text{NH}_4\text{SbF}_2\text{SO}_4$  under  $\text{N}_2$  atmosphere.

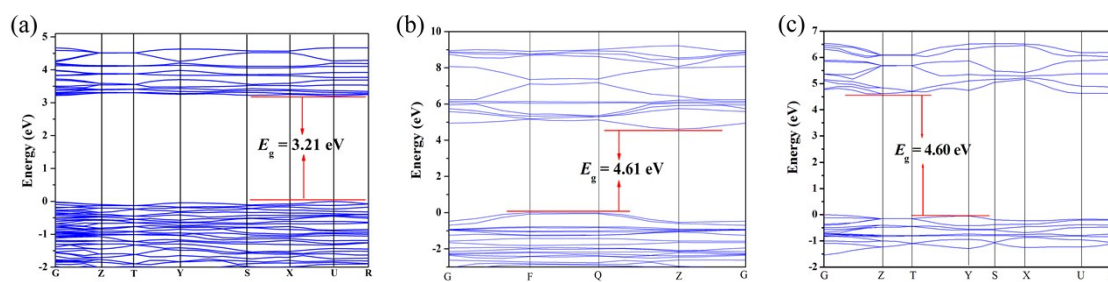

**Fig. S4.** Calculated band structures of  $\text{KTiOPO}_4$  (a),  $\text{NH}_4\text{SbFPO}_4 \cdot \text{H}_2\text{O}$  (b) and  $\text{NH}_4\text{SbF}_2\text{SO}_4$  (c).

## References

1. G. M. Sheldrick, *Acta Crystallogr., Sect. A: Found. Crystallogr.*, 2008, **64**, 112–122.
2. A. L. Spek, *J. Appl. Crystallogr.*, 2003, **36**, 7–13.
3. S. K. Kurtz and T. T. Perry, *J. Appl. Phys.*, 1968, **39**, 3798–3813.
4. S. J. Clark, M. D. Segall, C. J. Pickard, P. J. Hasnip, M. J. Probert, K. Refson and M. C. Payne, *Z. Kristallogr.*, 2005, **220**, 567–570.
5. J. P. Perdew, K. Burke and M. Ernzerhof, *Phys. Rev. Lett.*, 1996, **77**, 3865–3868.
6. D. Vanderbilt, *Phys. Rev. B*, 1990, **41**, 7892–7895.
